# Supplementary material for: Polymer-capped gold nanoparticles by ligand-exchange reactions
Source: Royal Society of Chemistry journal article supplement (doi:10.1039/b806375c), 2008-01-01
Supplement: b806375c.pdf [file b806375c.pdf]

# POLYMER-CAPPED GOLD NANOPARTICLES BY LIGAND-EXCHANGE REACTIONS

Simona Rucareanu,<sup>\*a</sup> Marco Maccarini,<sup>b</sup> Jeffrey L. Shepherd<sup>a,b</sup> and R. Bruce Lennox<sup>b</sup>

## Supplementary Information

Table S1 - TEM data for PEO<sub>45</sub>S-Au NP freshly prepared and kept for 6 months at 4°C

| Initial |            | After 6 months |                                       |
|---------|------------|----------------|---------------------------------------|
| 514 nm  | 4.6±1.4 nm | 517 nm         | 4.18±1.0 nm (redissolved in water)    |
| 514 nm  | 4.1±1.2 nm | 517 nm         | 4.04±1.1 nm (redissolved in water)    |
|         |            | 517 nm         | 3.78±1.1 nm (redissolved in EtOH 70%) |

Table S2 - Thermal stability data for PEO<sub>45</sub>S-Au NP

| Treatment      | Analytical data |             |
|----------------|-----------------|-------------|
| no heating     | 514 nm          | 4.10±0.9 nm |
| 30°C 1h        | 515 nm          | 4.06±1.0 nm |
| 40°C 1h        | 514 nm          | 3.50±0.9 nm |
| 50°C 1h        | 514 nm          | 3.80±1.0 nm |
| 60°C 1h        | 513 nm          | 3.90±1.1 nm |
| 60°C overnight | 511 nm          | 3.70±1.0 nm |

Table S3 - Analytical data for PEO<sub>45</sub>S-Au sterilized under various conditions.

|    | Before sterilization | After sterilization                                     |
|----|----------------------|---------------------------------------------------------|
| 1. | 4.2±1.0              | 4.2±1.2 sterilized as powder (wet procedure)            |
|    |                      | 4.3±1.2 sterilized as solution (wet procedure)          |
| 2. | 4.0±1.1              | 4.6±1.3 sterilized as powder (dry procedure, no vacuum) |
|    |                      | 4.4±1.4 sterilized as powder (dry procedure, vacuum)    |

Table S4 - Thermal stability data for PS<sub>16</sub>S-Au NP dispersed in PS<sub>25K</sub>

| Treatment  | Analytical data |             |
|------------|-----------------|-------------|
| no heating | 526 nm          | 5.14±1.0 nm |
| 140°C 4h   | 531 nm          | 4.73±1.3 nm |
| 160°C 1h   | 529 nm          | 4.67±1.1 nm |

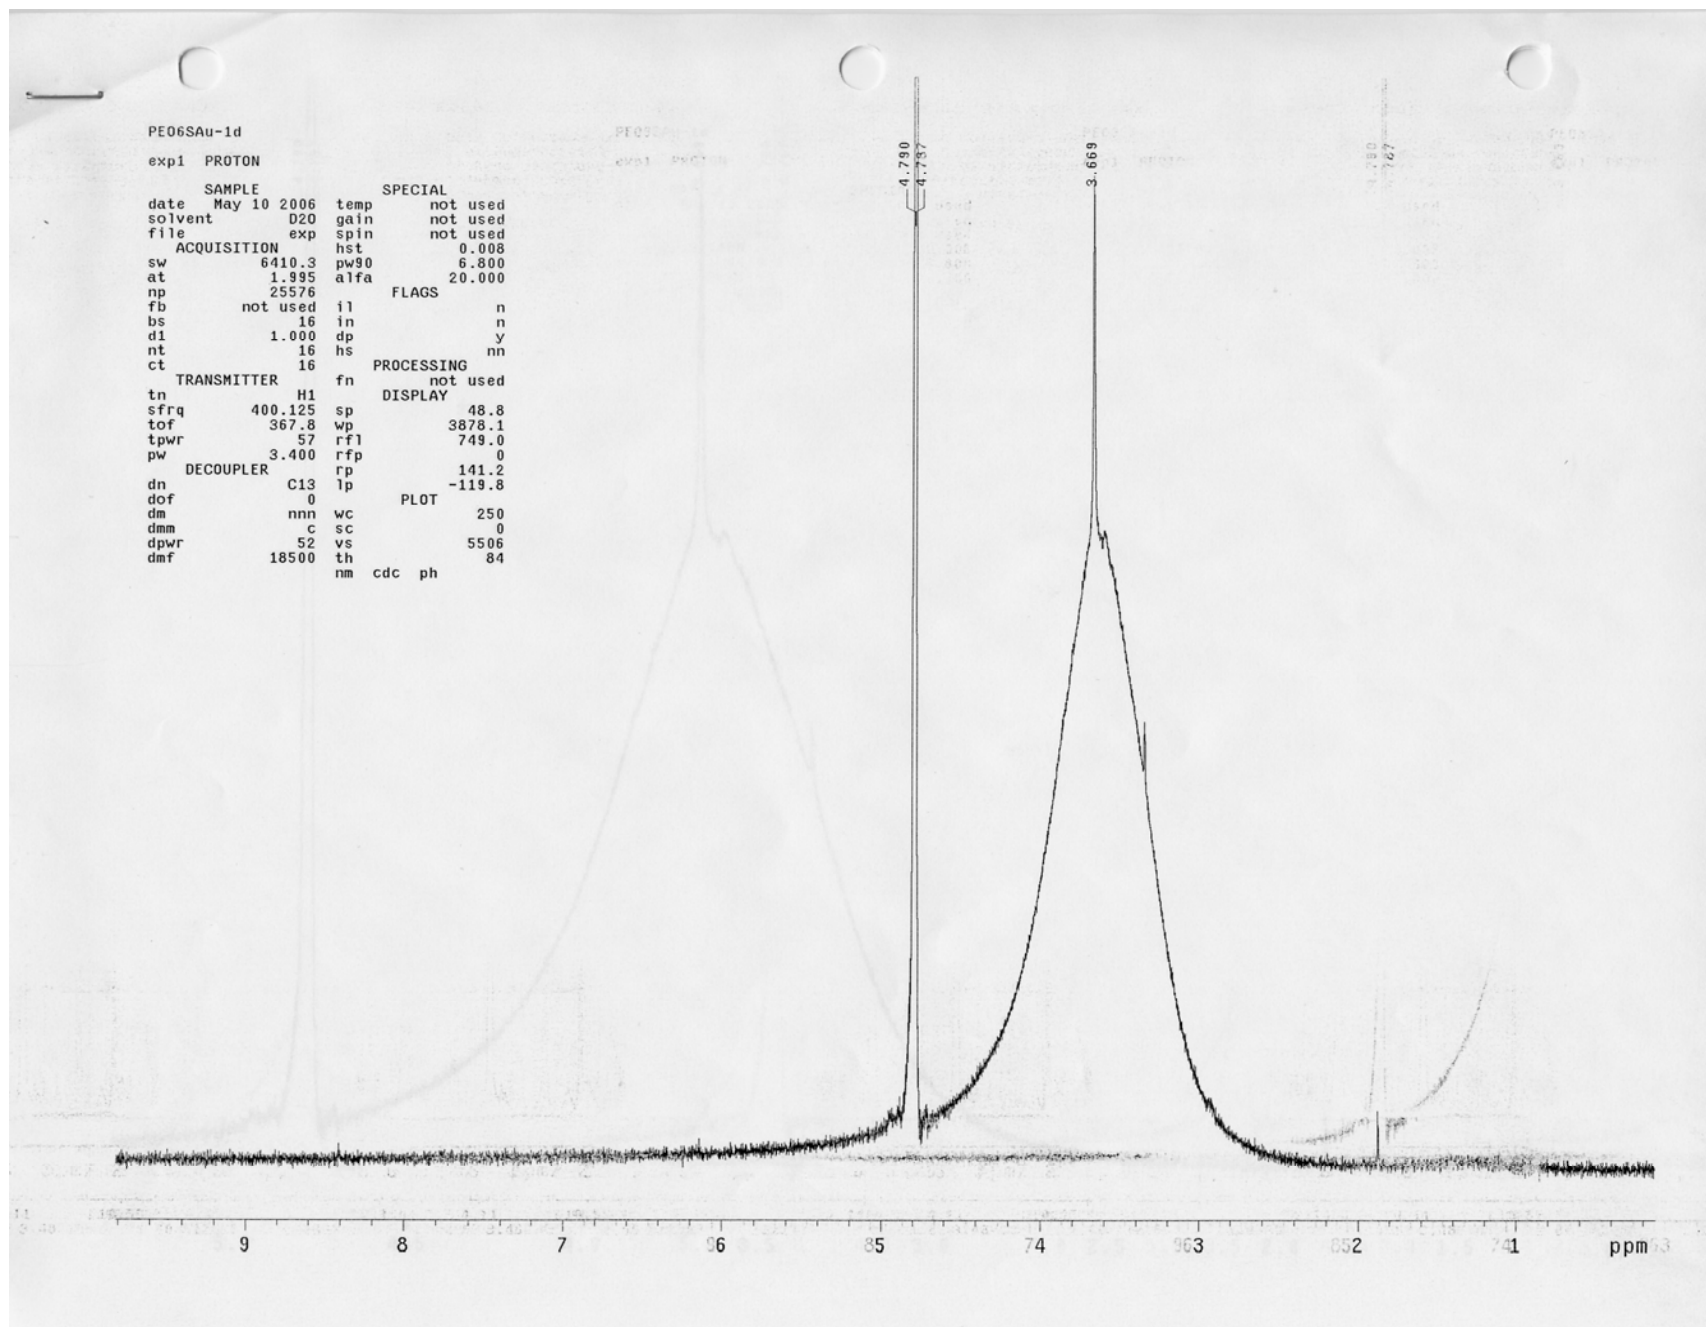

Figure S1 –  $^1\text{H}$  NMR spectrum of  $\text{PEO}_6\text{S-Au NP}$  in  $\text{D}_2\text{O}$

Sample: PEO6SAu  
Size: 4.7210 mg  
Method: Ramp  
Comment: Simona sample (Lennox)

### TGA

File: C:\...TGA\Lennox\Simona\PEO6SAu.001  
Operator: Petr Fiurasek  
Run Date: 17-May-06 10:00  
Instrument: TGA Q500 V4.10 Build 157

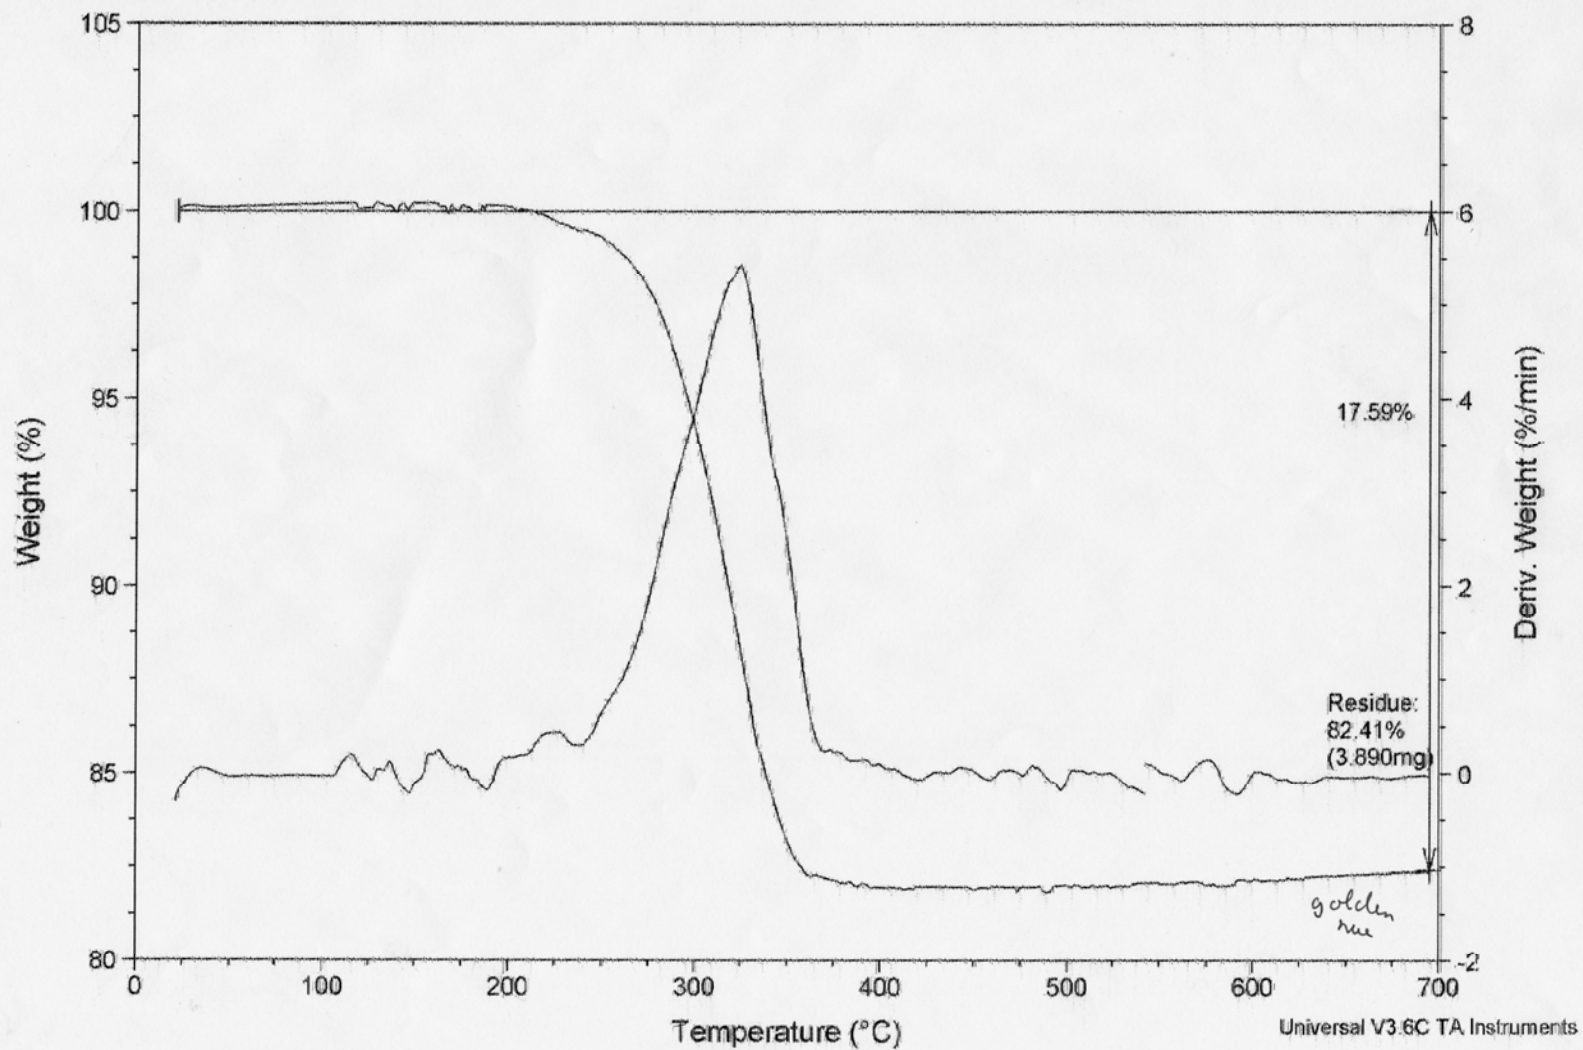

Figure S2 – TGA data for PEO<sub>6</sub>S-Au NP

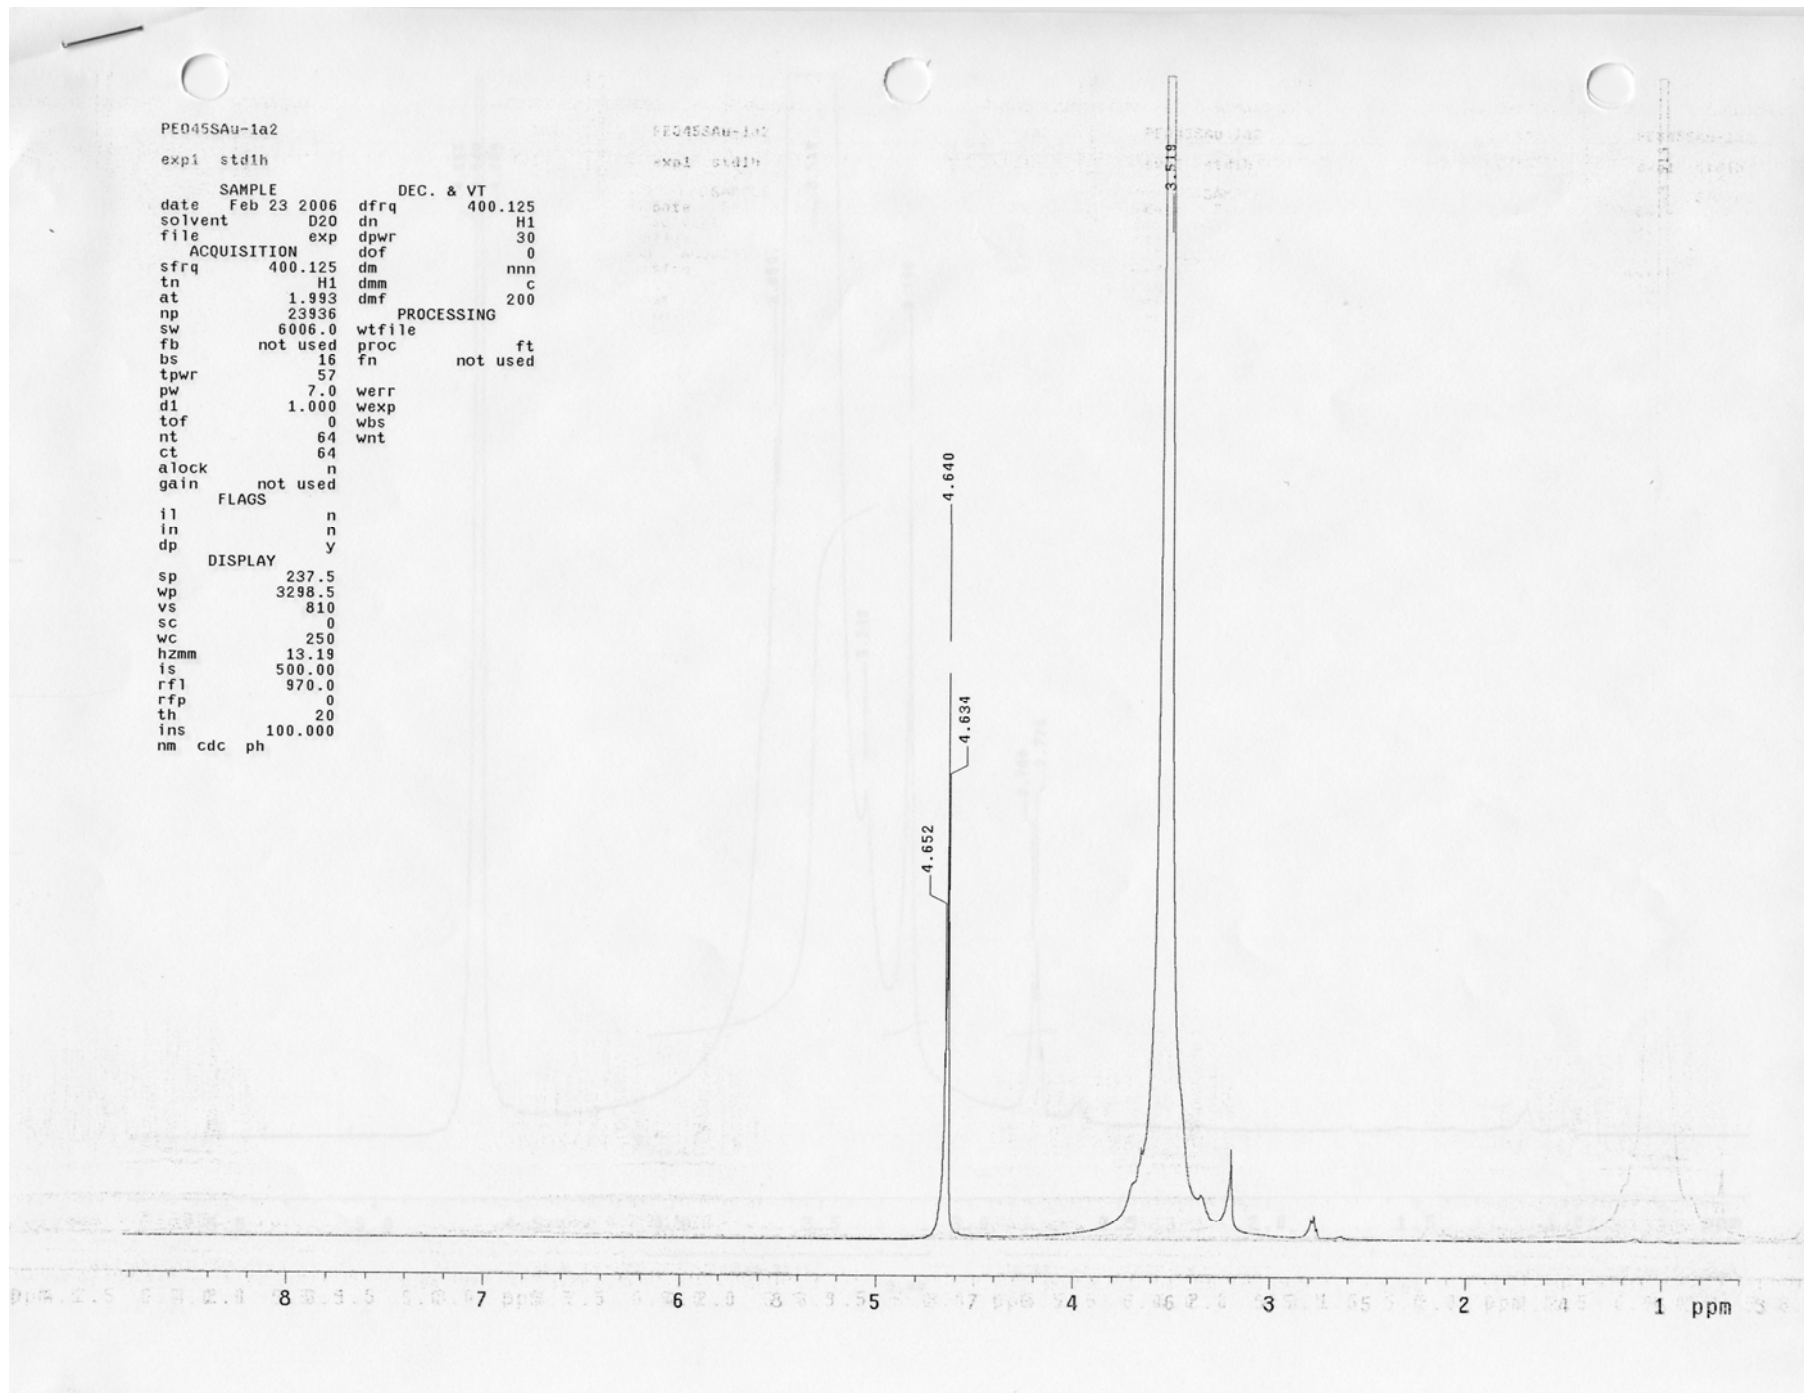

Figure S3 –  $^1\text{H}$  NMR spectrum of  $\text{PEO}_{45}\text{S-Au NP}$  in  $\text{D}_2\text{O}$

Sample: PEO45SAU-1a2  
Size: 3.6420 mg  
Method: Ramp  
Comment: Simona, gold nanoparticles

### TGA

File: C:\...TGA\Lennox\Simona\1a2.001  
Operator: Petr Fiurasek  
Run Date: 24-Mar-06 14:54  
Instrument: TGA Q500 V4.10 Build 157

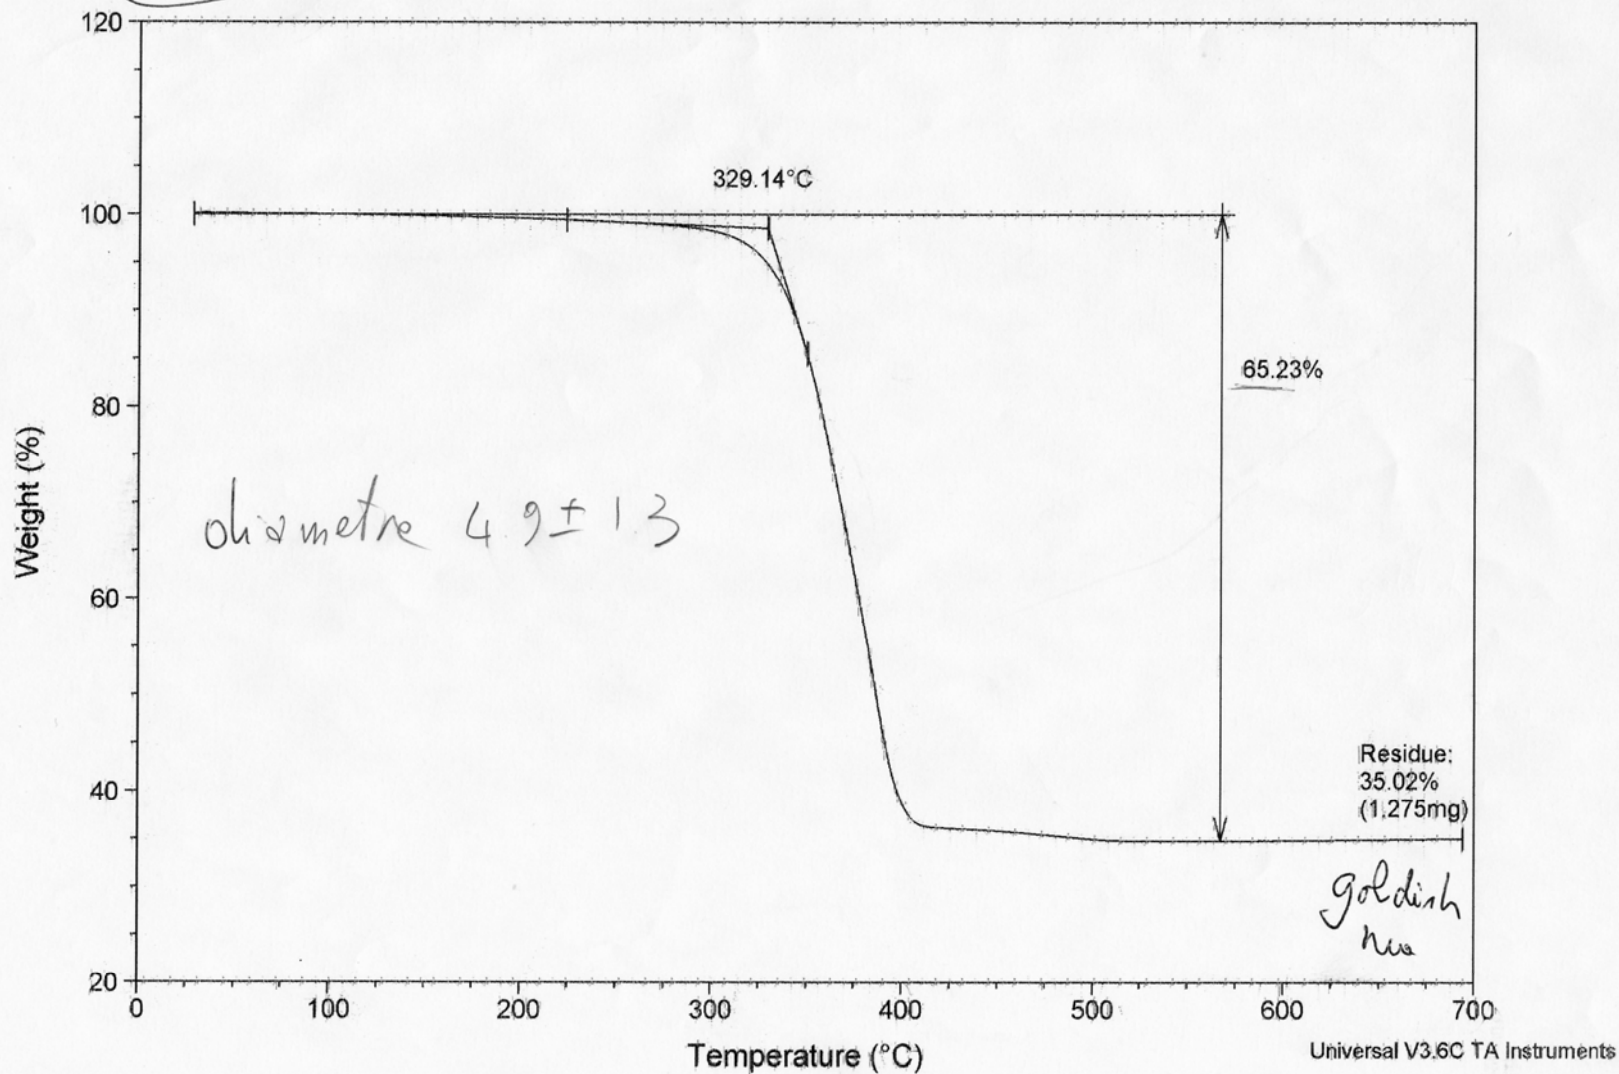

Figure S4 – TGA data for PEO<sub>45</sub>S-Au NP

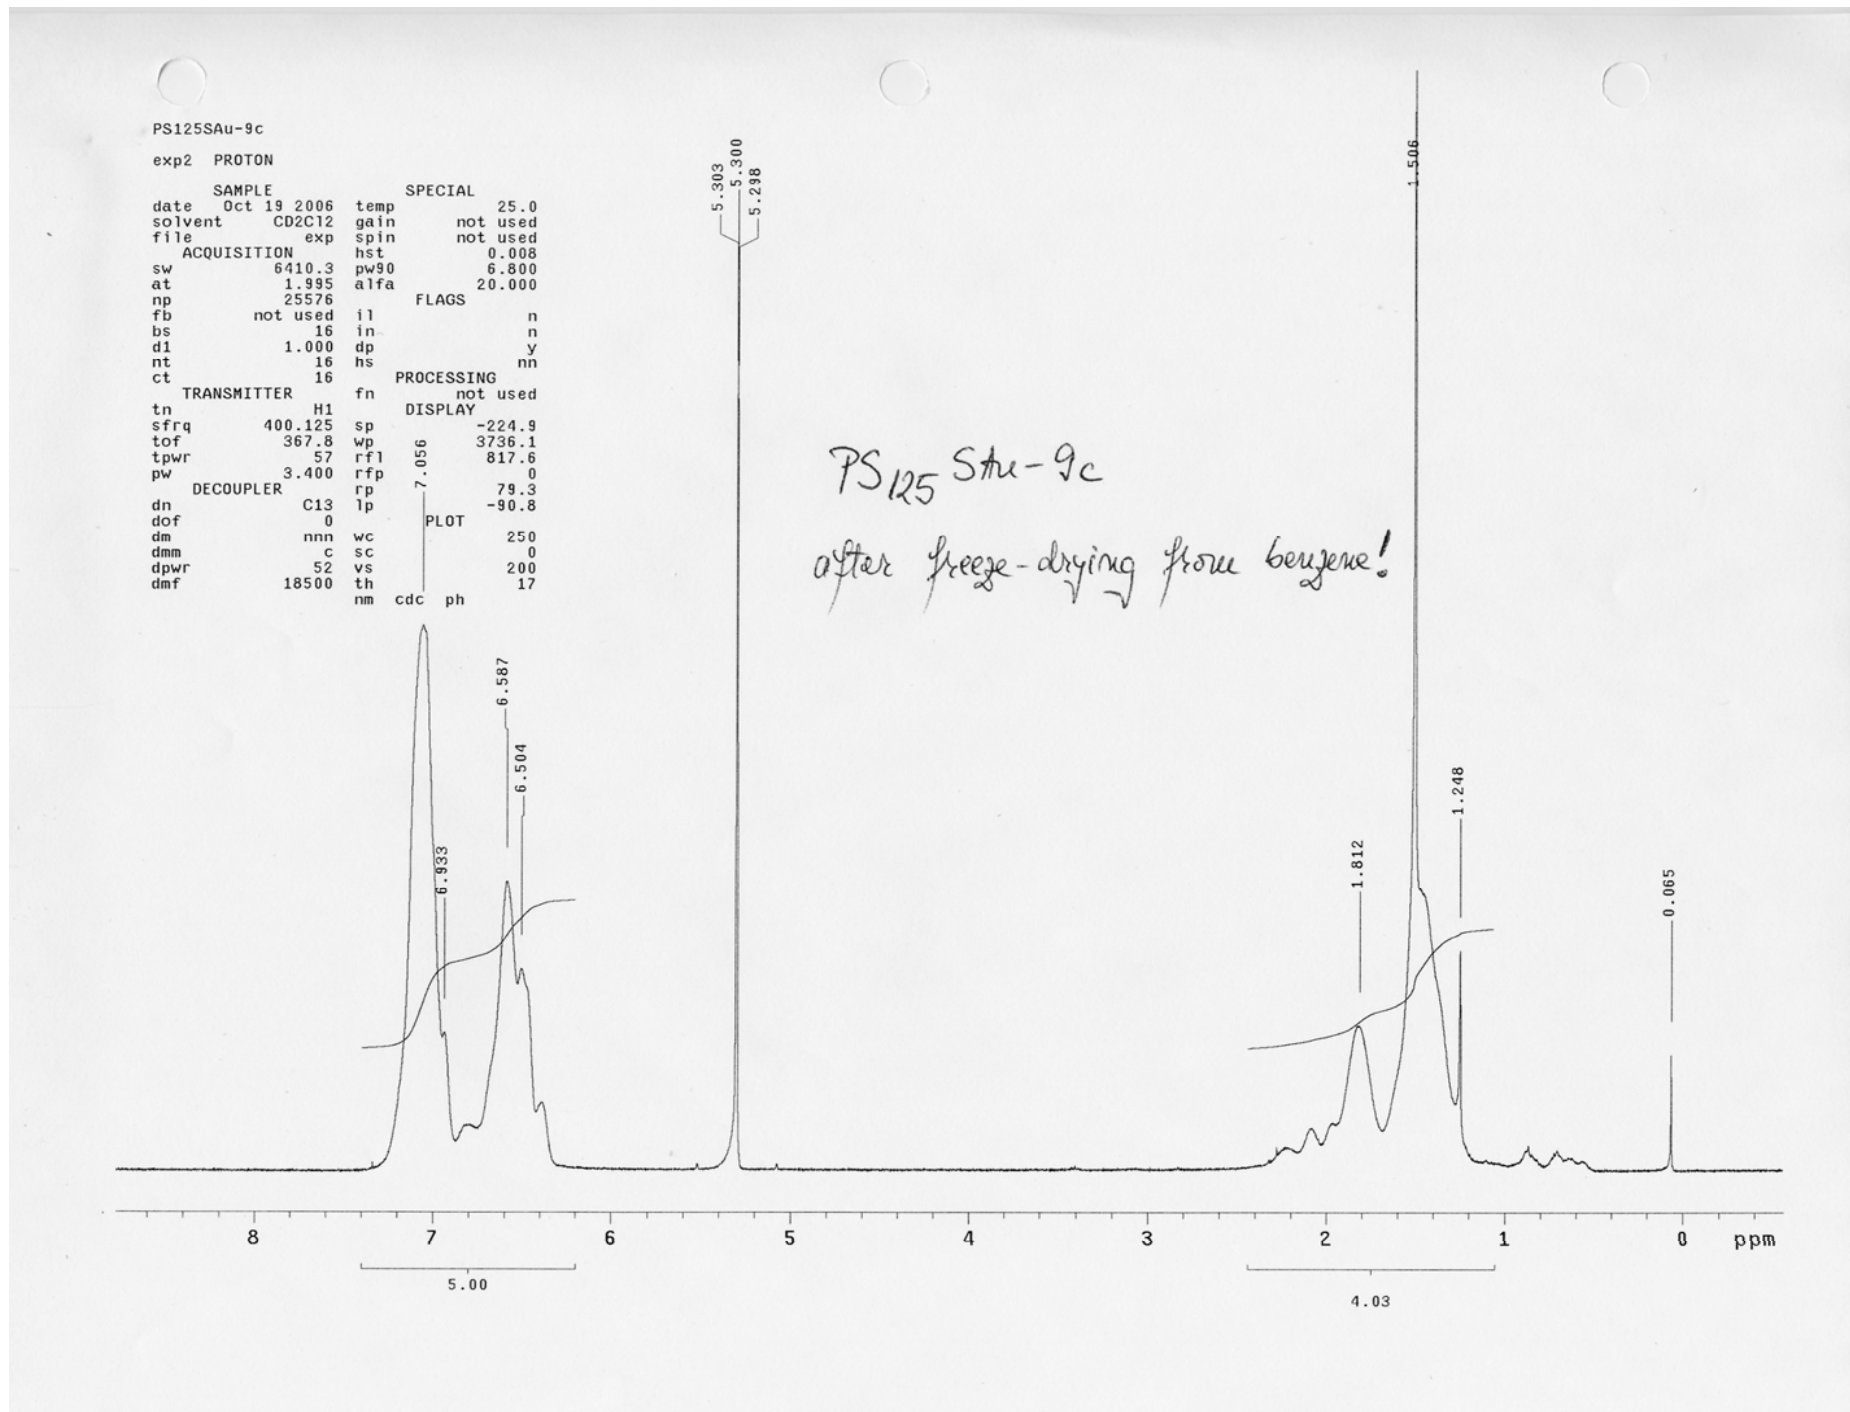

Figure S5 – <sup>1</sup>H NMR spectrum of PS<sub>125</sub>S-Au NP in CD<sub>2</sub>Cl<sub>2</sub> (nanoparticles freeze-dried from benzene)

Sample: PS125SAu10  
Size: 3.5530 mg  
Method: Ramp  
Comment: Simona (Lennox)

### TGA

File: C:\...TGA\Lennox\Simona\PS125SAu10.001  
Operator: Petr Fiarasek  
Run Date: 01-Nov-06 13:36  
Instrument: TGA Q500 V4.10 Build 157

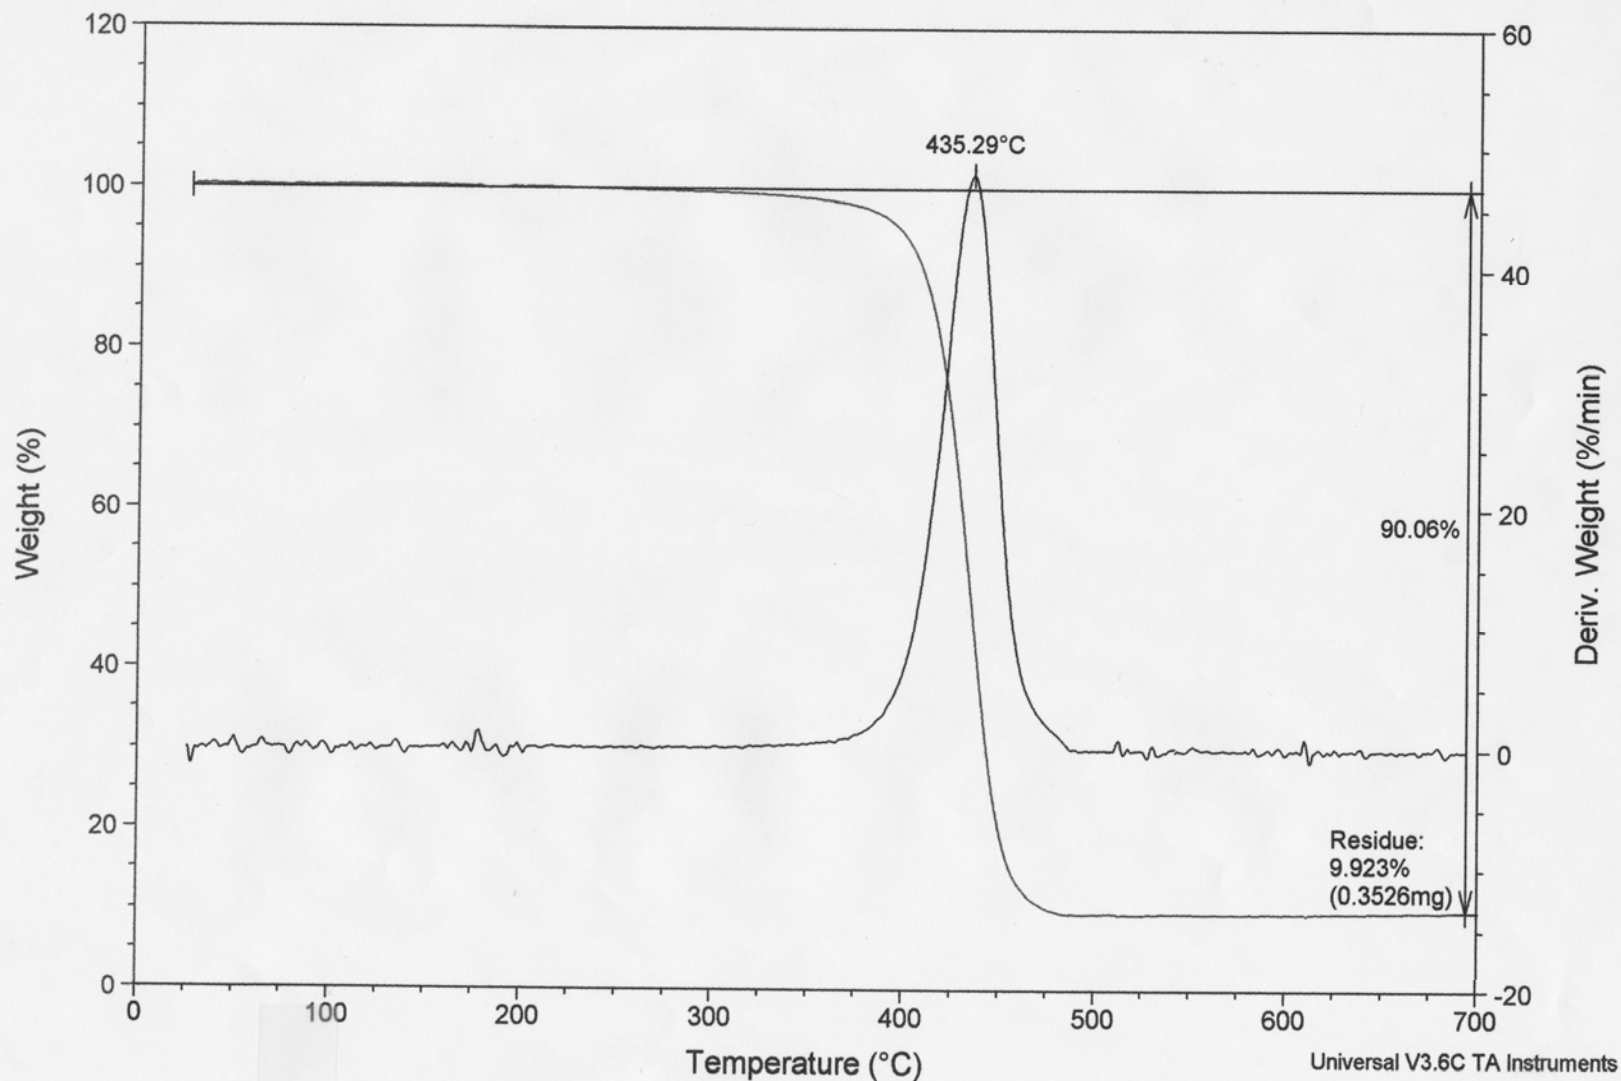

Figure S6 – TGA data for PS<sub>125</sub>S-Au NP (nanoparticles freeze-dried from benzene)

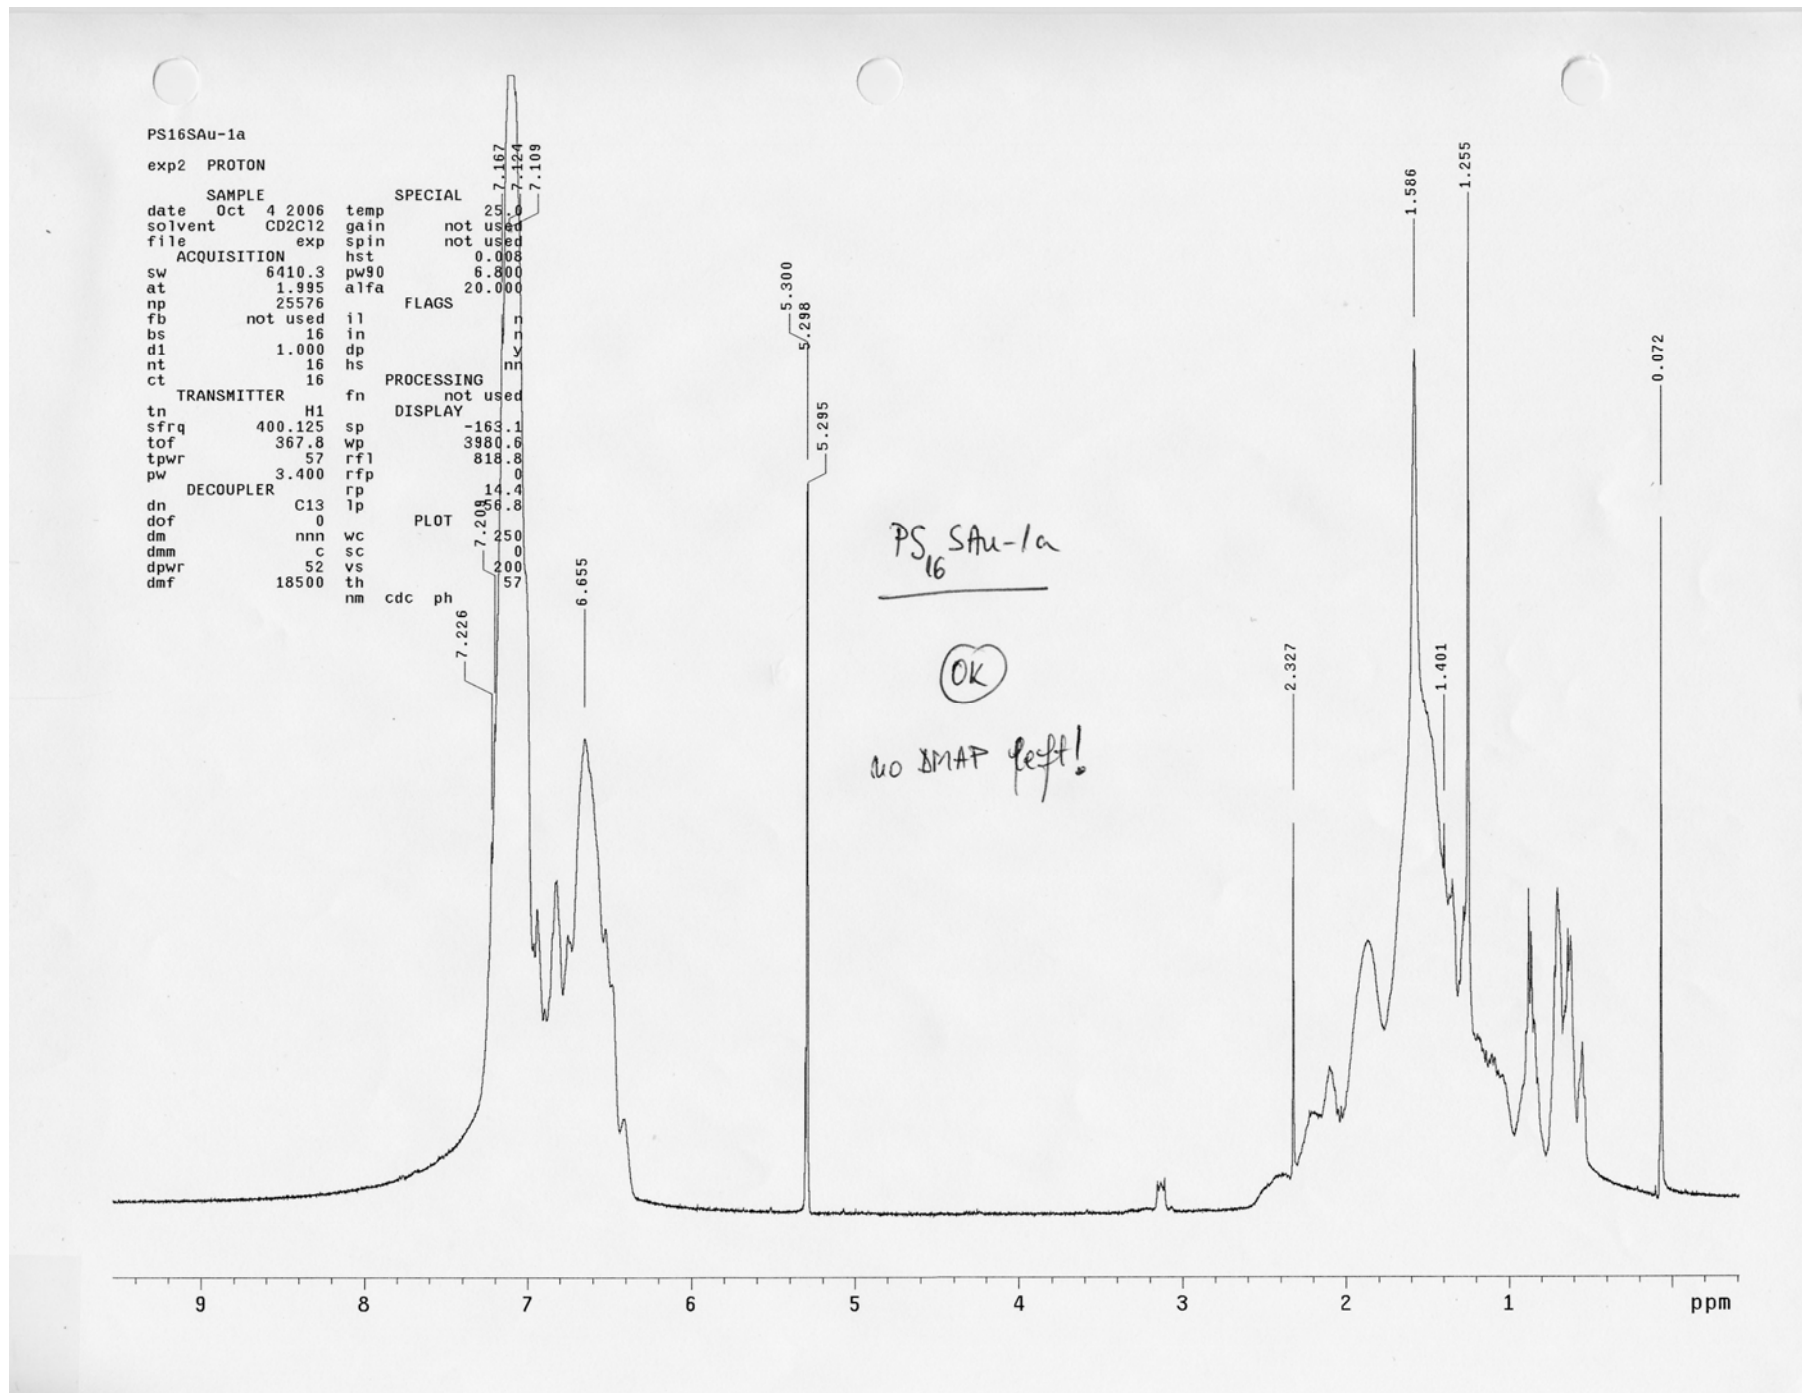

Figure S7 – <sup>1</sup>H NMR spectrum of PS<sub>16</sub>S-Au NP in CD<sub>2</sub>Cl<sub>2</sub> (nanoparticles freeze-dried from benzene)



Sample: PS16SAu1  
Size: 2.9710 mg  
Method: Ramp  
Comment: Simona Sample (Lennox)

### TGA

File: C:\...TGA\Lennox\Simona\PS16SAu1.001  
Operator: Petr Fiuřasek  
Run Date: 19-Oct-06 11:38  
Instrument: TGA Q500 V4.10 Build 157

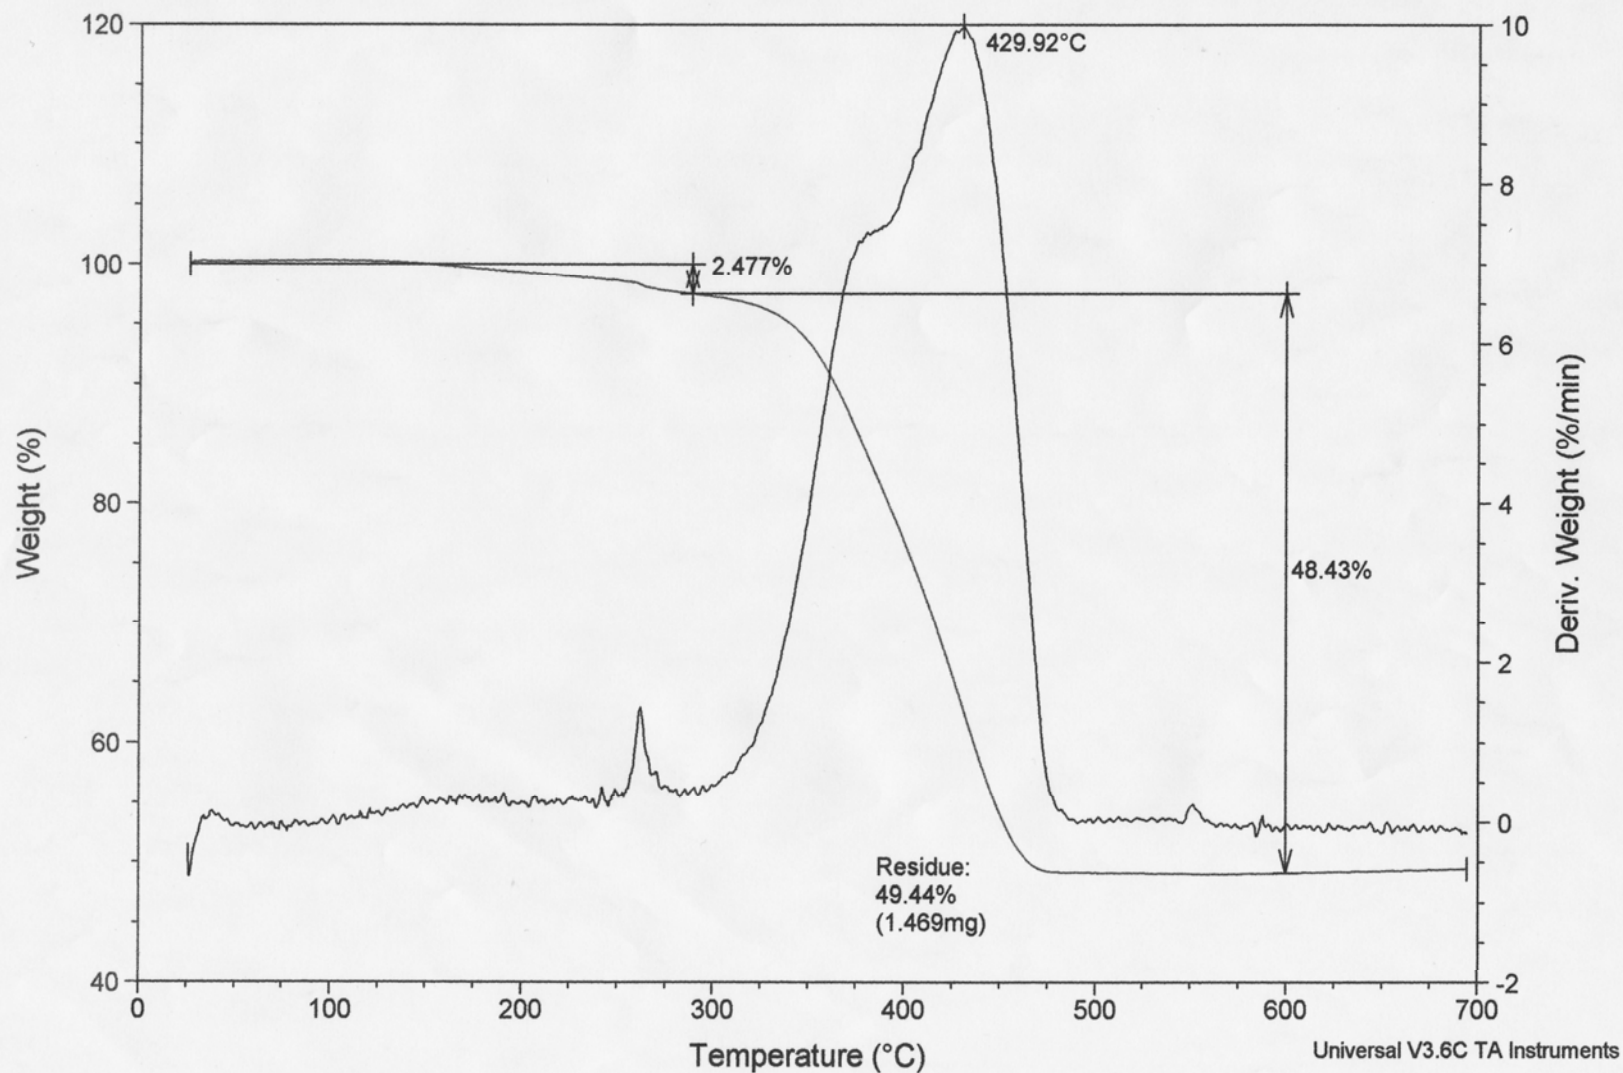

Figure S8 – TGA data for PS<sub>16</sub>S-Au NP (nanoparticles freeze-dried from benzene)
